# Supplementary material for: Levels of pathogen virulence and host resistance both shape the antibody response to an emerging bacterial disease
Source: PubMed Central journal article supplement (PMC8050079; doi:10.1038/s41598-021-87464-9), 2021-04-15

Supplementary Material

**Fig S1.** Within and among-individual variation in antibody levels over the course of the infection. We measured antibody levels (in ELISA Units (EU)/ml) at 14, 28 and 35 days post-inoculation (dpi). We show the best fit regression lines for each individual; points represent raw data. Figure is provided for illustrative purposes only, as fitting robust regressions through 3 measurements points is not possible.

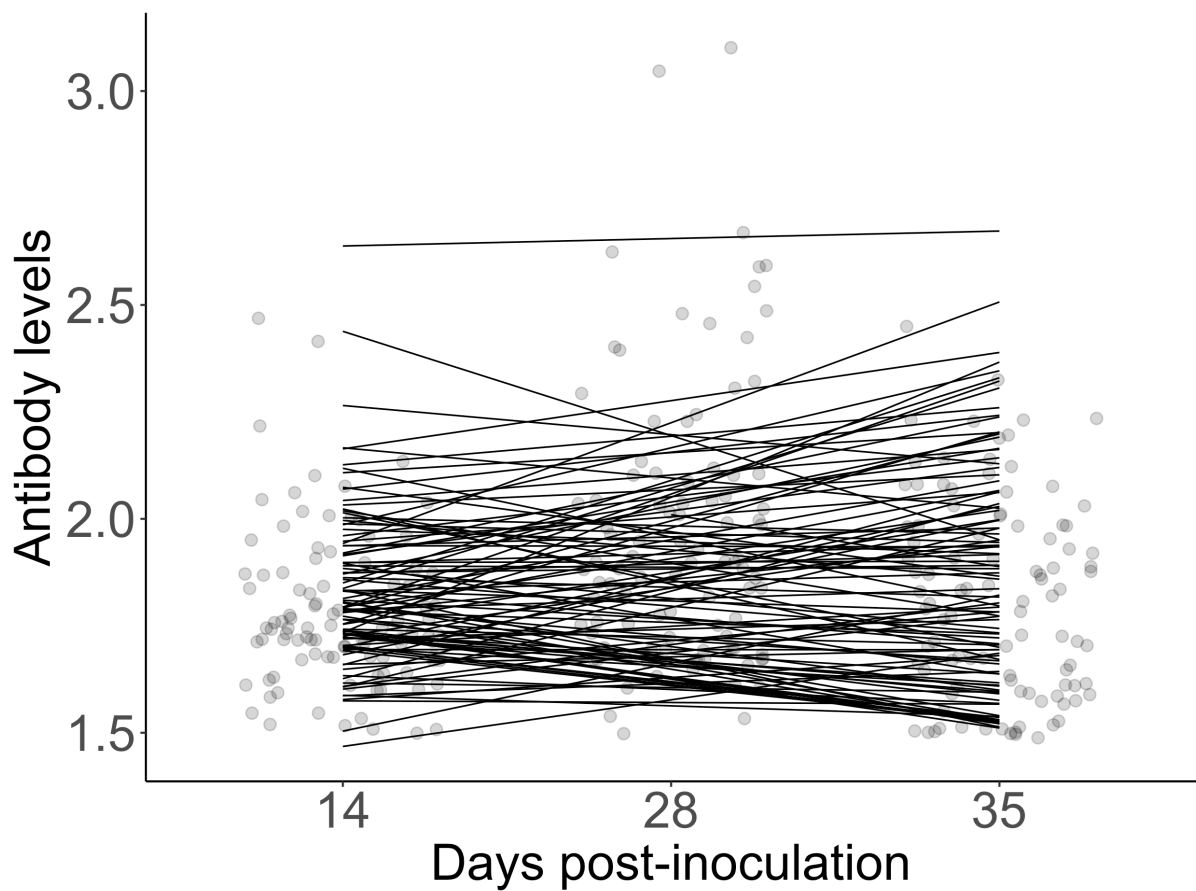

Supplement: 41598_2021_87464_MOESM1_ESM.pdf [file 41598_2021_87464_MOESM1_ESM.pdf]
